# Supplementary material for: Characterization of primary human mammary epithelial cells isolated and propagated by conditional reprogrammed cell culture
Source: PubMed Central journal article supplement (PMC5837767; doi:10.18632/oncotarget.23817), 2017-12-22
Supplement: oncotarget-09-11503-s001.pdf [file oncotarget-09-11503-s001.pdf]

## Characterization of primary human mammary epithelial cells isolated and propagated by conditional reprogrammed cell culture

### SUPPLEMENTARY MATERIALS

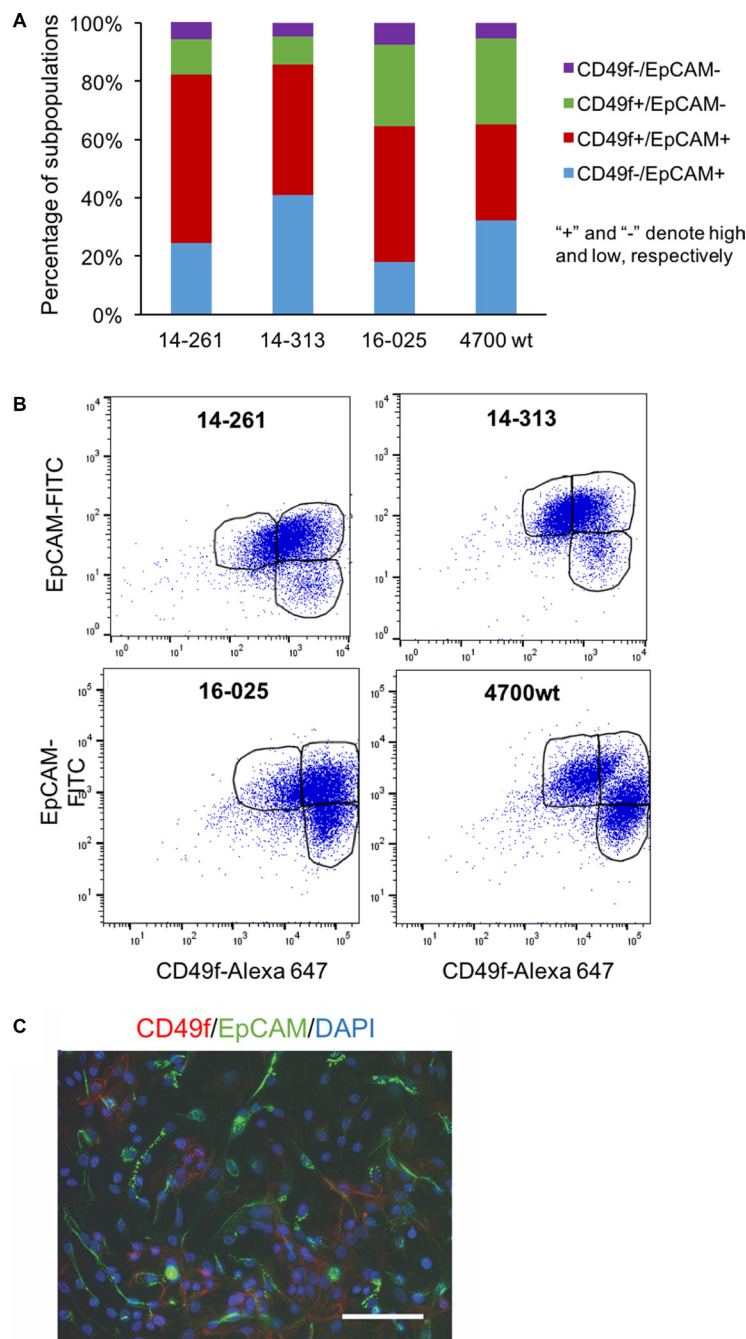

**Supplementary Figure 1: CD49f/EpCAM expression of primary human mammary cells.** Primary human mammary cells (samples 14–261, 14–313, 16–025, 4700 wt) were extracted from breast tissue and stained for EpCAM-FITC (green) and CD49f-AF647 (red). (A) Graphical representation of the percentages of CD49f-/EpCAM+, CD49f+/EpCAM+, CD49f+/EpCAM- and CD49f-/EpCAM-cells (see Supplementary Table S1 for quantification). (B) Flow cytometry analysis of CD49f-/EpCAM+, CD49f+/EpCAM+, CD49f+/EpCAM- and CD49f-/EpCAM- cells from the four samples. Circles were drawn to represent and quantify the CD49f-/EpCAM+ (top left), CD49f+/EpCAM+ (top right), and CD49f+/EpCAM- (bottom right) regions. (C) Immunofluorescence staining of fixed primary human mammary cells for EpCAM, CD49f, and the nucleus. “+” and “-” denote “high” and “low” expression, respectively.

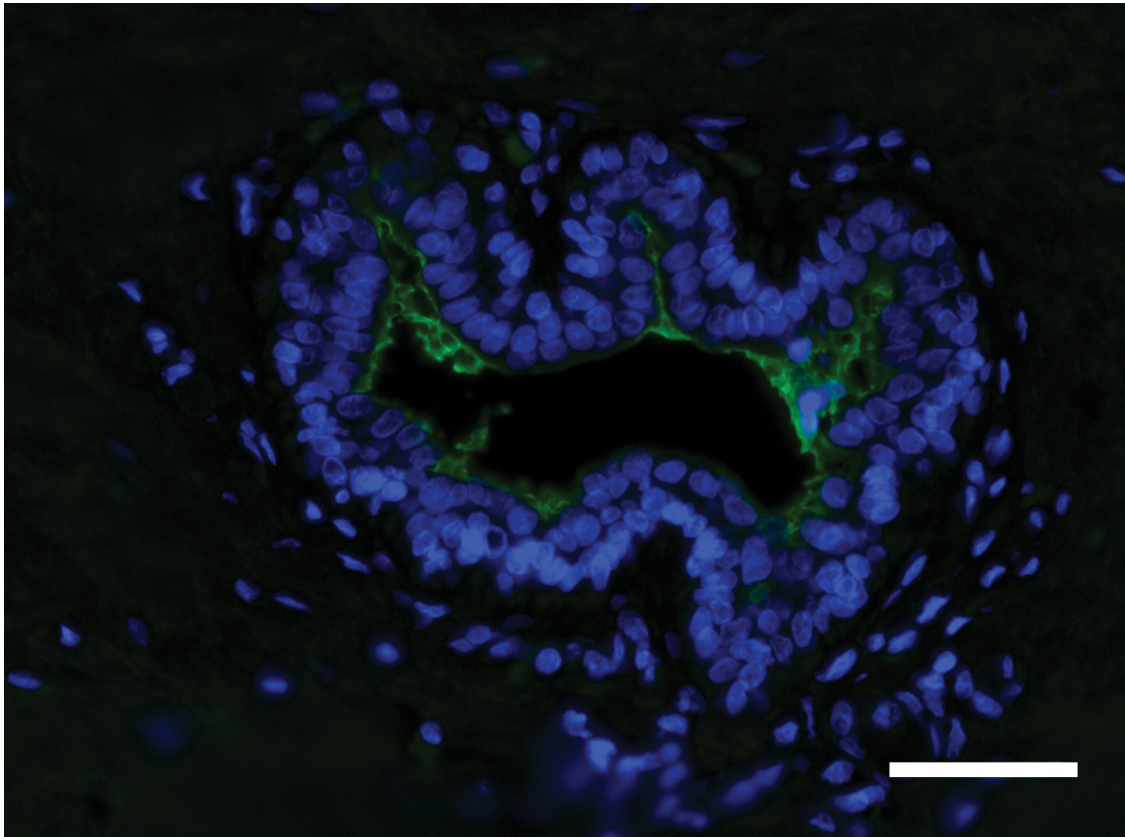

**Supplementary Figure 2: Milk protein expression in normal human breast tissue.** Milk protein expression in human breast tissue was examined by immunofluorescent staining. Secondary antibody conjugated with AF488 (green) was used to visualize the signal. DAPI was used for nuclear staining. Bars: 50  $\mu$ m. Original magnification: x400.

**Supplementary Table 1: ER $\alpha$  status and CD49f/EpCAM profiles in tested samples**

| Sample | ER $\alpha$ + | CD49f-/EpCAM+ | CD49f+/EpCAM+ | CD49f+/EpCAM- | CD49f-/EpCAM- |
|--------|---------------|---------------|---------------|---------------|---------------|
| 14-261 | 27.0%         | 24.3%         | 58.1%         | 12.0%         | 7.5%          |
| 14-313 | 30.0%         | 40.8%         | 44.8%         | 9.81%         | 4.59%         |
| 16-025 | < 5%          | 17.9%         | 46.6%         | 28.0%         | 7.5%          |
| 4700wt | < 5%          | 32.1%         | 33.1%         | 29.4%         | 5.4%          |

Note: ER $\alpha$ <sup>+</sup> cells in 16-025 and 4700wt were not detected by staining after passage 4.

**Supplementary Table 2: List of primary antibodies used in this study**

| Primary antibody | Marker for      | Source                            | Dilution |
|------------------|-----------------|-----------------------------------|----------|
| ER $\alpha$      | luminal         | Biocare                           | 1:100    |
| ER $\alpha$      | luminal         | Santa Cruz                        | 1:200    |
| GATA3            | luminal         | Santa Cruz                        | 1:200    |
| PR               | luminal         | Biocare                           | 1:100    |
| CK18             | luminal         | Abcam                             | 1:200    |
| CK14             | myoepithelial   | Biocare                           | 1:200    |
| P63              | myoepithelial   | Biocare                           | 1:200    |
| vimentin         | myoepithelial   | Biocare                           | 1:200    |
| CK19             | luminal         | Abcam                             | 1:200    |
| Desmoglein3      | luminal         | Biocare                           | 1:100    |
| EpCAM            | epithelial      | Abcam                             | 1:200    |
| CD49f            | Stem/progenitor | R&D                               | 1:200    |
| ALDH1A3          | Stem/progenitor | Santa Cruz                        | 1:200    |
| Ki-67            | proliferation   | Abcam                             | 1:500    |
| Milk protein     | Human milk      | Nordic Immunological Laboratories | 1:500    |
